# Supplementary material for: Dissection of a Complex Disease Susceptibility Region Using a Bayesian Stochastic Search Approach to Fine Mapping
Source: PubMed Central journal article supplement (PMC4481316; doi:10.1371/journal.pgen.1005272), 2015-06-24
Supplement: pgen.1005272.s009.pdf [file pgen.1005272.s009.pdf]

| Trait | Country                  | Patients | Controls |
|-------|--------------------------|----------|----------|
| T1D   | UK                       | 6693     | 12205    |
| MS    | Belgium                  | 322      | 313      |
| MS    | Denmark                  | 748      | 890      |
| MS    | Finland                  | 466      | 345      |
| MS    | France                   | 354      | 387      |
| MS    | Germany                  | 1893     | 2621     |
| MS    | Italy                    | 962      | 962      |
| MS    | Norway                   | 701      | 911      |
| MS    | Sweden                   | 1970     | 2121     |
| MS    | UK                       | 9359     | 4542     |
| MS    | USA                      | 2035     | 1837     |
| MS    | (all countries combined) | 18810    | 14929    |
