# Supplementary material for: Dissection of a Complex Disease Susceptibility Region Using a Bayesian Stochastic Search Approach to Fine Mapping
Source: PubMed Central journal article supplement (PMC4481316; doi:10.1371/journal.pgen.1005272), 2015-06-24
Supplement: pgen.1005272.s010.pdf [file pgen.1005272.s010.pdf]

| Causal variants | Method        | Criteria           | Discovery rate | False discovery rate |
|-----------------|---------------|--------------------|----------------|----------------------|
| 2               | GUESSFM-5     | gMPPI> 0.5         | 0.966          | 0.009                |
| 2               | GUESSFM-5     | gMPPI> 0.9         | 0.939          | 0.003                |
| 2               | GUESSFM-3     | gMPPI> 0.5         | 0.970          | 0.015                |
| 2               | GUESSFM-3     | gMPPI> 0.9         | 0.943          | 0.004                |
| 2               | Lasso         | min CV error       | 0.994          | 0.982                |
| 2               | Lasso         | first 3 predictors | 0.720          | 0.006                |
| 2               | Lasso         | first 5 predictors | 0.880          | 0.015                |
| 2               | Stepwise      | $p < 10^{-6}$      | 0.719          | 0.004                |
| 2               | Stepwise      | $p < 10^{-8}$      | 0.644          | 0.003                |
| 2               | Elastic net   | min CV error       | 0.997          | 0.982                |
| 2               | Elastic net   | first 3 predictors | 0.728          | 0.007                |
| 2               | Elastic net   | first 5 predictors | 0.891          | 0.017                |
| 2               | Grouped lasso | min CV error       | 0.986          | 0.947                |
| 2               | Grouped lasso | first 3 predictors | 0.671          | 0.021                |
| 2               | Grouped lasso | first 5 predictors | 0.846          | 0.044                |
| 3               | GUESSFM-5     | gMPPI> 0.5         | 0.900          | 0.011                |
| 3               | GUESSFM-5     | gMPPI> 0.9         | 0.797          | 0.002                |
| 3               | GUESSFM-3     | gMPPI> 0.5         | 0.900          | 0.021                |
| 3               | GUESSFM-3     | gMPPI> 0.9         | 0.833          | 0.005                |
| 3               | Lasso         | min CV error       | 0.992          | 0.974                |
| 3               | Lasso         | first 3 predictors | 0.534          | 0.005                |
| 3               | Lasso         | first 5 predictors | 0.692          | 0.013                |
| 3               | Stepwise      | $p < 10^{-6}$      | 0.552          | 0.009                |
| 3               | Stepwise      | $p < 10^{-8}$      | 0.458          | 0.005                |
| 3               | Elastic net   | min CV error       | 0.991          | 0.974                |
| 3               | Elastic net   | first 3 predictors | 0.548          | 0.008                |
| 3               | Elastic net   | first 5 predictors | 0.715          | 0.016                |
| 3               | Grouped lasso | min CV error       | 0.964          | 0.937                |
| 3               | Grouped lasso | first 3 predictors | 0.481          | 0.019                |
| 3               | Grouped lasso | first 5 predictors | 0.648          | 0.040                |
| 4               | GUESSFM-5     | gMPPI> 0.5         | 0.856          | 0.023                |
| 4               | GUESSFM-5     | gMPPI> 0.9         | 0.747          | 0.008                |
| 4               | GUESSFM-3     | gMPPI> 0.5         | 0.801          | 0.033                |
| 4               | GUESSFM-3     | gMPPI> 0.9         | 0.690          | 0.014                |
| 4               | Lasso         | min CV error       | 0.995          | 0.967                |
| 4               | Lasso         | first 3 predictors | 0.424          | 0.005                |
| 4               | Lasso         | first 5 predictors | 0.567          | 0.011                |
| 4               | Stepwise      | $p < 10^{-6}$      | 0.440          | 0.011                |
| 4               | Stepwise      | $p < 10^{-8}$      | 0.340          | 0.007                |
| 4               | Elastic net   | min CV error       | 0.995          | 0.966                |
| 4               | Elastic net   | first 3 predictors | 0.438          | 0.008                |
| 4               | Elastic net   | first 5 predictors | 0.588          | 0.016                |
| 4               | Grouped lasso | min CV error       | 0.928          | 0.931                |

| Causal variants | Method        | Criteria           | Discovery rate | False discovery rate |
|-----------------|---------------|--------------------|----------------|----------------------|
| 4               | Grouped lasso | first 3 predictors | 0.385          | 0.018                |
| 4               | Grouped lasso | first 5 predictors | 0.530          | 0.037                |
| 5               | GUESSFM-5     | gMPPI > 0.5        | 0.755          | 0.033                |
| 5               | GUESSFM-5     | gMPPI > 0.9        | 0.635          | 0.008                |
| 5               | GUESSFM-3     | gMPPI > 0.5        | 0.715          | 0.038                |
| 5               | GUESSFM-3     | gMPPI > 0.9        | 0.589          | 0.014                |
| 5               | Lasso         | min CV error       | 0.993          | 0.958                |
| 5               | Lasso         | first 3 predictors | 0.360          | 0.005                |
| 5               | Lasso         | first 5 predictors | 0.494          | 0.011                |
| 5               | Stepwise      | $p < 10^{-6}$      | 0.346          | 0.014                |
| 5               | Stepwise      | $p < 10^{-8}$      | 0.252          | 0.007                |
| 5               | Elastic net   | min CV error       | 0.993          | 0.958                |
| 5               | Elastic net   | first 3 predictors | 0.389          | 0.010                |
| 5               | Elastic net   | first 5 predictors | 0.518          | 0.016                |
| 5               | Grouped lasso | min CV error       | 0.911          | 0.918                |
| 5               | Grouped lasso | first 3 predictors | 0.326          | 0.017                |
| 5               | Grouped lasso | first 5 predictors | 0.455          | 0.036                |
