# Supplementary material for: Dissection of a Complex Disease Susceptibility Region Using a Bayesian Stochastic Search Approach to Fine Mapping
Source: PubMed Central journal article supplement (PMC4481316; doi:10.1371/journal.pgen.1005272), 2015-06-24
Supplement: pgen.1005272.s011.pdf [file pgen.1005272.s011.pdf]

| Ensembl ID      | Gene Symbol   | Log <sub>2</sub> fold change | <i>p</i>                | Read counts |             |                |                |
|-----------------|---------------|------------------------------|-------------------------|-------------|-------------|----------------|----------------|
|                 |               |                              |                         | Resting (1) | Resting (2) | Stimulated (1) | Stimulated (2) |
| ENSG00000134460 | <i>IL2RA</i>  | 5.93                         | $2.60 \times 10^{-124}$ | 189         | 294         | 9561           | 13644          |
| ENSG00000170525 | <i>PFKFB3</i> | 1.85                         | $1.63 \times 10^{-15}$  | 1372        | 1903        | 3881           | 5045           |
| ENSG00000134453 | <i>RBM17</i>  | 1.59                         | $2.34 \times 10^{-19}$  | 1344        | 1495        | 3458           | 3138           |
